# Supplementary material for: Integrated Analysis of Transcriptomics and Metabolomics Unveil the Novel Insight of One-Year-Old Precocious Mechanism in the Chinese Mitten Crab, Eriocheir sinensis
Source: MDPI journal article supplement (doi:10.3390/ijms241311171), 2023-07-06
Supplement: s1 [file s1]

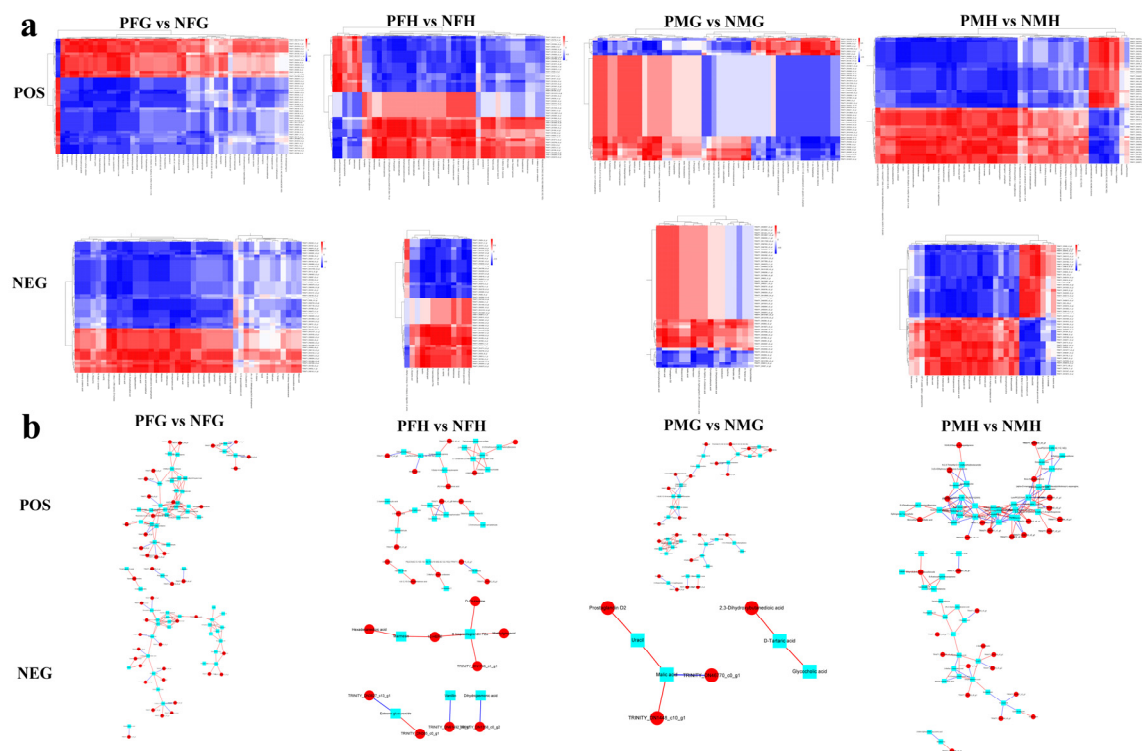

Figure S1. The spearman correlation heatmaps (a) and network regulation figures (b) of each comparison group with POS mode and NEG mode. a: The columns represent differential genes, and the rows represent differential metabolites. The magnitude of correlation is shown by different colors, where  $P < 0.05$  is marked with \*. b: circles are differential genes, rectangles are differential metabolites, blue lines indicate negative correlations and red lines indicate positive correlations.
